# Supplementary material
Source: PubMed Central journal article supplement (PMC7542841)
Supplement: ao0c04318_si_001.pdf [file ao0c04318_si_001.pdf]

# Supporting information

---

## Comparison of Vitamin C and Its Derivative Antioxidant Activity: Evaluated by Using Density Functional Theory

Yuyang Liu,<sup>†</sup> Chuanqun Liu,<sup>‡</sup> and Jianjun Li<sup>\*,†</sup>

<sup>†</sup>Department of Orthopaedic Surgery, Shengjing Hospital of China Medical University,

Shenyang, China

<sup>‡</sup>School of Energy and Power Engineering, Northeast Electric Power University, JiLin, China

Corresponding author: cmuljj@126.com

### List of supporting information:

Table S1: BDE values of VC and its derivatives calculated in the water and gas phase at the B3LYP/6-31G\* level.

Table S2: IP values of VC and its derivatives calculated in the water and gas phase at the B3LYP/6-31G\* level.

Table S3: PDE values of VC and its derivatives calculated in the water and gas phase at the B3LYP/6-31G\* level.

Table S4: PA values of VC and its derivatives calculated in the water and gas phase at the B3LYP/6-31G\* level.

Table S5: ETE values of VC and its derivatives calculated in the water and gas phase at the B3LYP/6-31G\* level.

Table S6: Total energy requirements related to the HAT, SET-PT, and SPLET mechanisms of VC and its derivatives calculated in the water and gas phase.

Figure S1: Optimized geometries of TS in the reaction between VC and its derivatives with OH•.

**Table S1: BDE values of VC and its derivatives calculated in the water and gas phase at the B3LYP/6-31G\* level (the lowest values are highlighted in BOLD).**

| Species   | BDE(kJ/mol)   |               |
|-----------|---------------|---------------|
|           | water         | gas           |
| AA-O_7    | 308.89        | 323.24        |
| AA-O_8    | <b>301.78</b> | <b>297.19</b> |
| AA-O_12   | 502.84        | 404.85        |
| AA-O_10   | 509.69        | 417.28        |
| AA2G-O_25 | 580.30        | 407.50        |
| AA2G-O_22 | 420.20        | 418.20        |
| AA2G-O_19 | 409.30        | 401.40        |
| AA2G-O_30 | 410.10        | 408.10        |
| AA2G-O_1  | <b>309.00</b> | <b>302.80</b> |
| AA2G-O_7  | 423.20        | 402.60        |
| AA2G-O_9  | 410.20        | 398.80        |
| AAE-O_4   | 545.85        | 399.32        |
| AAE-O_3   | 525.71        | 400.66        |
| AAE-O_5   | <b>306.15</b> | <b>300.91</b> |
| AA6P-O_7  | 310.87        | 307.02        |
| AA6P-O_6  | <b>309.62</b> | <b>296.91</b> |
| AA6P-O_11 | 424.11        | 412.05        |

**Table S2: IP values of VC and its derivatives calculated in the water and gas phase at the B3LYP/6-31G\* level (the lowest values are highlighted in BOLD).**

| Species | IP(kJ/mol)    |               |
|---------|---------------|---------------|
|         | water         | gas           |
| AA      | <b>575.01</b> | 796.79        |
| AA2G    | 607.79        | 826.74        |
| AAE     | 582.45        | <b>762.35</b> |
| AA6P    | 623.08        | 796.74        |

**Table S3: PDE values of VC and its derivatives calculated in the water and gas phase at the B3LYP/6-31G\* level.**

| Species   | PDE(kJ/mol) |         |
|-----------|-------------|---------|
|           | water       | gas     |
| AA-O_7    | 1055.25     | 873.71  |
| AA-O_8    | 1062.33     | 847.73  |
| AA-O_12   | 1256.18     | 967.81  |
| AA-O_10   | 1173.75     | 955.24  |
| AA2G-O_25 | 1313.20     | 912.17  |
| AA2G-O_22 | 1153.51     | 922.96  |
| AA2G-O_19 | 1142.27     | 823.28  |
| AA2G-O_30 | 1143.19     | 921.87  |
| AA2G-O_1  | 1042.00     | 927.95  |
| AA2G-O_7  | 1156.17     | 937.24  |
| AA2G-O_9  | 1152.78     | 928.60  |
| AAE-O_4   | 1297.28     | 968.25  |
| AAE-O_3   | 1284.10     | 985.54  |
| AAE-O_5   | 1064.55     | 885.78  |
| AA6P-O_7  | 1029.20     | 902.22  |
| AA6P-O_6  | 1026.33     | 904.52  |
| AA6P-O_11 | 1140.93     | 1011.01 |

**Table S4: PA values of VC and its derivatives calculated in the water and gas phase at the B3LYP/6-31G\* level(the lowest values are highlighted in BOLD).**

| Species   | PA(kJ/mol)     |                |
|-----------|----------------|----------------|
|           | water          | gas            |
| AA-O_7    | 1217.20        | 1415.28        |
| AA-O_8    | 1180.96        | 1361.72        |
| AA-O_12   | 1688.17        | <b>1347.80</b> |
| AA-O_10   | <b>1178.14</b> | 1350.33        |
| AA2G-O_25 | 1257.45        | 1484.60        |
| AA2G-O_22 | 1241.80        | 1449.93        |
| AA2G-O_19 | 1252.78        | 1486.09        |
| AA2G-O_30 | 1251.46        | 1453.69        |
| AA2G-O_1  | <b>1168.33</b> | <b>1285.85</b> |
| AA2G-O_7  | 1168.37        | <b>1285.85</b> |
| AA2G-O_9  | 1290.09        | 1511.03        |
| AAE-O_4   | 1291.10        | 1465.17        |
| AAE-O_3   | 1289.67        | 1462.15        |
| AAE-O_5   | <b>1225.33</b> | <b>1443.71</b> |
| AA6P-O_7  | 1227.12        | 1421.62        |
| AA6P-O_6  | <b>1210.90</b> | <b>1376.87</b> |
| AA6P-O_11 | 1280.24        | 1513.86        |

**Table S5: ETE values of VC and its derivatives calculated in the water and gas phase at the B3LYP/6-31G\* level(the lowest values are highlighted in BOLD).**

| Species   | ETE(kJ/mol) |        |
|-----------|-------------|--------|
|           | water       | gas    |
| AA-O_7    | 434.35      | 246.08 |
| AA-O_8    | 461.57      | 282.66 |
| AA-O_12   | -42.07      | 303.24 |
| AA-O_10   | 476.95      | 302.96 |
| AA2G-O_25 | 663.50      | 270.08 |
| AA2G-O_22 | 526.50      | 320.63 |
| AA2G-O_19 | 497.38      | 262.56 |
| AA2G-O_30 | 499.24      | 303.32 |
| AA2G-O_1  | 485.98      | 354.52 |
| AA2G-O_7  | 485.97      | 354.52 |
| AA2G-O_9  | 460.99      | 234.92 |
| AAE-O_4   | 474.81      | 280.37 |
| AAE-O_3   | 466.19      | 273.72 |
| AAE-O_5   | 421.59      | 204.41 |
| AA6P-O_7  | 422.79      | 281.63 |
| AA6P-O_6  | 452.72      | 281.23 |
| AA6P-O_11 | 483.76      | 247.54 |

**Table S6: Total energy requirements related to the HAT, SET-PT, and SPLET mechanisms of VC and its derivatives calculated in the water and gas phase.**

| Species | BDE(kJ/mol) |        | IP+PDE(kJ/mol) |         | PA+ETE(kJ/mol) |         |
|---------|-------------|--------|----------------|---------|----------------|---------|
|         | water       | gas    | water          | gas     | water          | gas     |
| AA      | 301.78      | 297.19 | 1630.26        | 1644.51 | 1642.53        | 1644.38 |
| AA2G    | 309.03      | 302.75 | 1649.79        | 1650.02 | 1654.31        | 1640.37 |
| AAE     | 306.15      | 300.91 | 1647.01        | 1648.13 | 1646.92        | 1648.12 |
| AA6P    | 309.62      | 296.91 | 1649.41        | 1698.96 | 1649.91        | 1658.10 |

Figure S1: Optimized geometries of TS in the reaction between VC(A), AA2G(B), AAE(C), and AA6P(D) with OH•. Oxygen atoms are shown in red; gray is carbon; white is hydrogen.

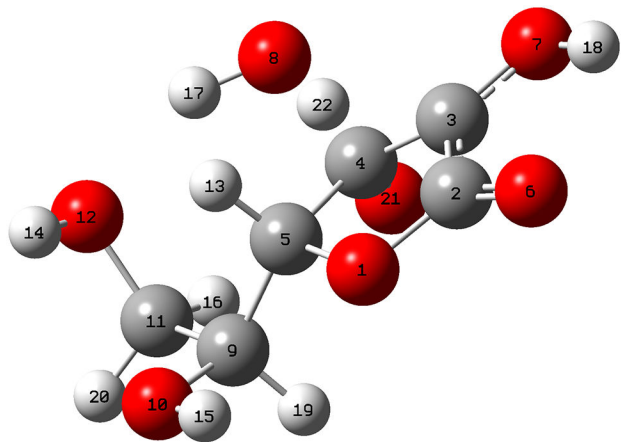

A

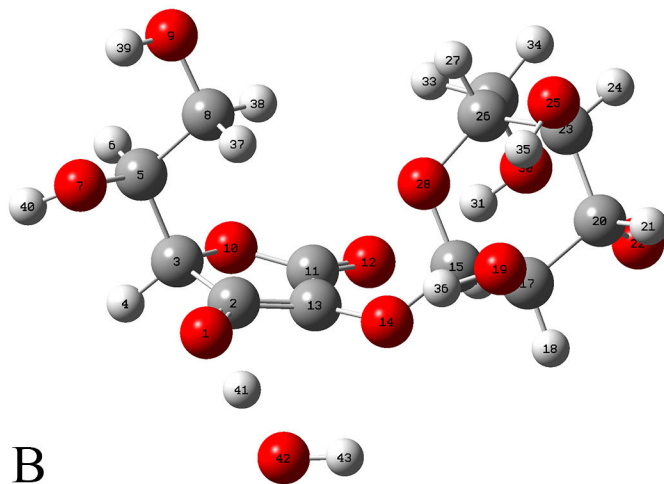

B

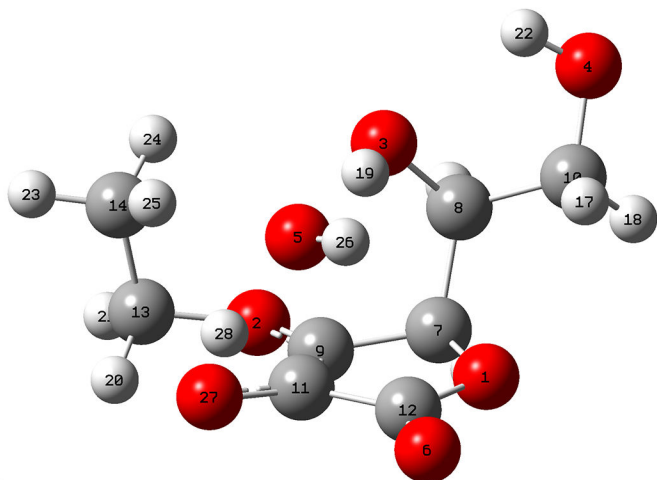

C

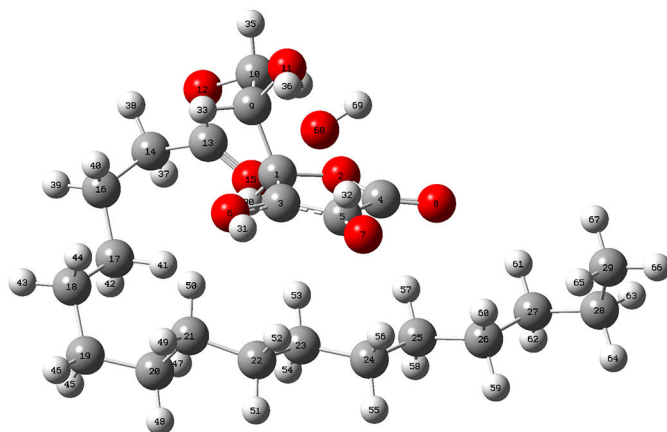

D
